# Supplementary material for: Alcohol consumption and survival after breast cancer diagnosis in Japanese women: A prospective patient cohort study
Source: PLoS One. 2019 Nov 13;14(11):e0224797. doi: 10.1371/journal.pone.0224797 (PMC6853331; doi:10.1371/journal.pone.0224797)
Supplement: S2 File — (PDF) [file pone.0224797.s002.pdf]

(7) トイレ動作（服、下着の上げ下げ、排泄後の後始末など）はできますか。

1. できる      2. 介助されればできる      3. できない

(8) あなたはタバコを吸いますか。

1. 吸っている      2. 止めた（      年前,      ケ月前）      3. 吸わない

↳ 止めた理由    ア. 病気のため    イ. 健康保持のため    ウ. その他

1 または 2 に○をつけた場合,

（      ）歳から吸い始め、1日に平均（      ）本くらい

(9) 結婚されている場合、あなたの配偶者（夫または妻）はタバコを吸っておられますか。

1. 吸っている      2. 止めた（      年前,      ケ月前）      3. 吸わない

(10) あなたはお酒（アルコール類）を飲みますか。

1. 飲む      2. 止めた（      年前,      ケ月前）      3. ほとんど飲まない

↳ 止めた理由    ア. 病気のため    イ. 健康保持のため    ウ. その他

1 または 2 に○をつけた場合,

1) 飲み始めたのは何歳の時ですか。      （      ）歳

2) どれ位飲みますか（飲んでいましたか）。

ア. ほとんど毎日（週5回以上）      イ. 週3～4回

ウ. 週1～2回      エ. 週1回以下

3) あなたがふつうよく飲む酒に○をつけて下さい。（いくつでも）

ア. 日本酒      イ. 焼酎      ウ. ビール      エ. ウイスキー

オ. ワイン      カ. その他

4) 飲む量は平均すると、1回あたりどの位ですか。日本酒に換算してください。（換算のし方は、表を参照してください）

ア. 1合より少ない      イ. 約1合      ウ. 約2合

エ. 約3合      オ. 約4合      カ. 約5合以上

焼酎1合は .....日本酒約1.5合

ビール大びん1本は .....日本酒約1合

ウイスキーダブル1杯は .....日本酒約1合

ワイン1合は .....日本酒約1合

に当たる

うすめて飲むときは、うすめる前の量で計算してください
